# Supplementary material for: Human and Viral microRNA Expression in Acute and Chronic HIV Infections
Source: MDPI journal article supplement (doi:10.3390/v16040496), 2024-03-23
Supplement: s1 [file s1]

**Supplementary Table S1.** Differentially expressed miRNAs in AHI versus CHI (p-value< 0.05).

| Name            | Identifier         | Max group mean | Log <sub>2</sub> fold change | Fold change | p-value | FDR p-value | Bonferroni |
|-----------------|--------------------|----------------|------------------------------|-------------|---------|-------------|------------|
| hsa-miR-122-5p  | URS00003380CC_9606 | 42069.692      | 4.512                        | 22.824      | 3E-09   | 3E-06       | 5E-06      |
| hsa-miR-550a-3p | URS00001F14FE_9606 | 9.200          | -3.120                       | -8.696      | 4E-06   | 0.002       | 0.006      |
| hsa-miR-1290    | URS000043F369_9606 | 50.462         | 3.315                        | 9.950       | 8E-06   | 0.003       | 0.012      |
| hsa-miR-1246    | URS000028C188_9606 | 169.385        | 2.656                        | 6.304       | 2E-05   | 0.004       | 0.027      |
| hsa-miR-296-5p  | URS00001C3AC1_9606 | 48.600         | -1.973                       | -3.925      | 2E-05   | 0.004       | 0.032      |
| hsa-miR-483-5p  | URS000003575B_9606 | 107.846        | 2.805                        | 6.990       | 4E-05   | 0.007       | 0.067      |
| hsa-miR-432-5p  | URS00001C406A_9606 | 3887.077       | 1.783                        | 3.440       | 6E-05   | 0.008       | 0.095      |
| hsa-miR-193b-5p | URS00000E1DC5_9606 | 10.615         | 3.801                        | 13.935      | 6E-05   | 0.008       | 0.101      |
| hsa-miR-483-3p  | URS00000EA063_9606 | 16.692         | 2.747                        | 6.712       | 1E-04   | 0.012       | 0.170      |
| hsa-miR-497-3p  | URS000007D64A_9606 | 5.800          | -2.854                       | -7.230      | 2E-04   | 0.014       | 0.237      |
| hsa-miR-10b-5p  | URS000058760A_9606 | 153.846        | 2.053                        | 4.150       | 2E-04   | 0.014       | 0.245      |
| hsa-miR-184     | URS0000543D82_9606 | 14.692         | 2.873                        | 7.326       | 2E-04   | 0.014       | 0.262      |
| hsa-miR-885-3p  | URS00003F4546_9606 | 5.923          | 4.087                        | 16.997      | 3E-04   | 0.026       | 0.546      |
| hsa-miR-1285-3p | URS0000399545_9606 | 21.200         | -1.490                       | -2.809      | 5E-04   | 0.033       | 0.746      |
| hsa-miR-324-3p  | URS0000D50706_9606 | 190.400        | -1.058                       | -2.083      | 0.001   | 0.035       | 0.840      |
| hsa-miR-6501-5p | URS000075C286_9606 | 13.800         | -1.709                       | -3.269      | 0.001   | 0.049       | 1          |
| hsa-miR-1-3p    | URS00001DC04F_9606 | 1301.077       | 1.741                        | 3.342       | 0.001   | 0.049       | 1          |
| hsa-miR-3605-3p | URS00000A9FB9_9606 | 27.538         | 1.197                        | 2.293       | 0.001   | 0.072       | 1          |
| hsa-miR-542-5p  | URS000050C722_9606 | 42.600         | -1.316                       | -2.489      | 0.002   | 0.072       | 1          |
| hsa-miR-500a-5p | URS000039A052_9606 | 19.000         | -1.455                       | -2.741      | 0.002   | 0.072       | 1          |
| hsa-miR-326     | URS00000A939F_9606 | 1319.400       | -1.215                       | -2.322      | 0.002   | 0.072       | 1          |
| hsa-miR-9983-3p | URS0000D4FF80_9606 | 7.200          | -2.029                       | -4.082      | 0.002   | 0.072       | 1          |
| hsa-miR-29a-5p  | URS0000076995_9606 | 28.000         | -1.485                       | -2.798      | 0.002   | 0.072       | 1          |
| hsa-miR-1307-5p | URS00000EEF5F_9606 | 892.600        | -1.558                       | -2.945      | 0.002   | 0.095       | 1          |
| hsa-miR-885-5p  | URS0000246356_9606 | 7.000          | 2.733                        | 6.647       | 0.002   | 0.095       | 1          |
| hsa-miR-125b-5p | URS0000209905_9606 | 726.615        | 1.274                        | 2.418       | 0.003   | 0.096       | 1          |
| hsa-miR-641     | URS000039D790_9606 | 58.800         | -1.226                       | -2.339      | 0.003   | 0.100       | 1          |
| hsa-miR-3127-3p | URS0000292363_9606 | 7.200          | -1.605                       | -3.042      | 0.003   | 0.100       | 1          |
| hsa-miR-106a-5p | URS00003FE4D4_9606 | 478.000        | -1.021                       | -2.029      | 0.003   | 0.117       | 1          |
| hsa-miR-28-3p   | URS00001799A3_9606 | 3947.400       | 1.048                        | 2.068       | 0.005   | 0.148       | 1          |
| hsa-miR-4516    | URS00000BF7F9_9606 | 6.615          | 2.226                        | 4.678       | 0.005   | 0.148       | 1          |
| hsa-miR-18b-5p  | URS00004565E5_9606 | 13.800         | -1.445                       | -2.722      | 0.005   | 0.159       | 1          |
| hsa-miR-4697-3p | URS00003685CF_9606 | 12.800         | -2.604                       | -6.081      | 0.005   | 0.159       | 1          |
| hsa-miR-6764-5p | URS000075AAD9_9606 | 13.385         | 1.367                        | 2.579       | 0.006   | 0.169       | 1          |
| hsa-miR-4286    | URS0000353492_9606 | 165.000        | -1.020                       | -2.027      | 0.006   | 0.169       | 1          |
| hsa-miR-766-3p  | URS00001012BC_9606 | 427.800        | -1.158                       | -2.232      | 0.006   | 0.175       | 1          |
| hsa-miR-193a-5p | URS0000367985_9606 | 84.077         | 1.432                        | 2.697       | 0.007   | 0.176       | 1          |
| hsa-miR-377-3p  | URS000007F792_9606 | 210.600        | -1.199                       | -2.296      | 0.007   | 0.177       | 1          |
| hsa-miR-940     | URS000041FA2C_9606 | 18.600         | -1.444                       | -2.720      | 0.007   | 0.177       | 1          |
| hsa-miR-6515-3p | URS000075BDA4_9606 | 9.600          | -1.197                       | -2.293      | 0.007   | 0.177       | 1          |

|                   |                    |           |        |        |       |       |   |
|-------------------|--------------------|-----------|--------|--------|-------|-------|---|
| hsa-miR-100-5p    | URS000040D674_9606 | 22.692    | 1.507  | 2.842  | 0.007 | 0.177 | 1 |
| hsa-miR-409-3p    | URS00002915C8_9606 | 4477.000  | 0.823  | 1.769  | 0.008 | 0.177 | 1 |
| hsa-miR-22-3p     | URS0000096022_9606 | 7567.000  | -1.066 | -2.093 | 0.008 | 0.177 | 1 |
| hsa-miR-3176      | URS00004AAAFF_9606 | 5.000     | -1.889 | -3.704 | 0.008 | 0.177 | 1 |
| hsa-miR-2355-3p   | URS00003804D8_9606 | 344.800   | -1.076 | -2.108 | 0.008 | 0.177 | 1 |
| hsa-miR-191-5p    | URS00005C2E31_9606 | 56250.200 | 1.107  | 2.154  | 0.008 | 0.177 | 1 |
| hsa-miR-5187-5p   | URS000036B845_9606 | 105.077   | 1.328  | 2.511  | 0.008 | 0.177 | 1 |
| hsa-miR-1537-3p   | URS000010F787_9606 | 23.400    | -1.503 | -2.835 | 0.010 | 0.205 | 1 |
| hsa-miR-584-3p    | URS000006BE7D_9606 | 11.600    | -1.230 | -2.345 | 0.010 | 0.206 | 1 |
| hsa-miR-3960      | URS00003783AB_9606 | 3.000     | 2.104  | 4.300  | 0.013 | 0.247 | 1 |
| hsa-miR-3667-3p   | URS000075E2C3_9606 | 7.200     | -1.722 | -3.300 | 0.013 | 0.247 | 1 |
| hsa-miR-148a-5p   | URS00003E16E5_9606 | 88.000    | -1.027 | -2.038 | 0.014 | 0.248 | 1 |
| hsa-miR-210-3p    | URS000055128B_9606 | 156.400   | -0.893 | -1.856 | 0.014 | 0.248 | 1 |
| hsa-miR-4707-3p   | URS000018D2BE_9606 | 3.200     | -2.125 | -4.363 | 0.014 | 0.248 | 1 |
| hsa-miR-95-3p     | URS00002E2DE7_9606 | 22.308    | 1.294  | 2.451  | 0.014 | 0.248 | 1 |
| hsa-miR-664b-5p   | URS000042B108_9606 | 54.769    | 1.289  | 2.443  | 0.014 | 0.248 | 1 |
| hsa-miR-1268b     | URS000033B91D_9606 | 1.538     | 3.616  | 12.259 | 0.014 | 0.248 | 1 |
| hsa-miR-1275      | URS000009EA8F_9606 | 15.200    | -1.967 | -3.909 | 0.015 | 0.248 | 1 |
| hsa-miR-9985      | URS0000D4FAF7_9606 | 3.692     | 1.722  | 3.299  | 0.016 | 0.248 | 1 |
| hsa-miR-18a-3p    | URS00004131FE_9606 | 76.800    | -1.016 | -2.022 | 0.016 | 0.248 | 1 |
| hsa-miR-676-3p    | URS00004407DC_9606 | 1.615     | 4.312  | 19.862 | 0.016 | 0.248 | 1 |
| hsa-miR-224-5p    | URS0000D55DFB_9606 | 2664.154  | 1.093  | 2.133  | 0.016 | 0.248 | 1 |
| hsa-miR-3614-3p   | URS000042BE4B_9606 | 5.000     | -1.553 | -2.934 | 0.016 | 0.248 | 1 |
| hsa-miR-182-5p    | URS00001CC379_9606 | 870.385   | 0.834  | 1.783  | 0.016 | 0.248 | 1 |
| hsa-miR-29b-3p    | URS000024463E_9606 | 2805.000  | -0.887 | -1.849 | 0.017 | 0.256 | 1 |
| hsa-miR-323a-3p   | URS00003CCAB4_9606 | 172.769   | 0.965  | 1.951  | 0.017 | 0.256 | 1 |
| hsa-miR-218-5p    | URS000020D84A_9606 | 3.769     | 2.254  | 4.770  | 0.018 | 0.261 | 1 |
| hsa-miR-363-3p    | URS000038B599_9606 | 2360.200  | -0.804 | -1.746 | 0.020 | 0.283 | 1 |
| hsa-miR-320e      | URS00003B6B84_9606 | 3.615     | 2.068  | 4.193  | 0.020 | 0.283 | 1 |
| hsa-miR-4646-5p   | URS00001A6D0C_9606 | 2.385     | 2.142  | 4.413  | 0.020 | 0.283 | 1 |
| hsa-miR-339-3p    | URS000055B190_9606 | 710.200   | -0.931 | -1.906 | 0.021 | 0.283 | 1 |
| hsa-miR-4449      | URS00004DE2FC_9606 | 3.200     | -1.613 | -3.058 | 0.021 | 0.283 | 1 |
| hsa-miR-6779-5p   | URS000075A236_9606 | 2.692     | 1.973  | 3.927  | 0.021 | 0.283 | 1 |
| hsa-miR-181a-2-3p | URS0000241987_9606 | 273.769   | 0.815  | 1.760  | 0.022 | 0.283 | 1 |
| hsa-miR-4669      | URS00001062A2_9606 | 1.538     | 4.216  | 18.586 | 0.022 | 0.283 | 1 |
| hsa-miR-7705      | URS000060B2B9_9606 | 7.800     | -1.340 | -2.531 | 0.023 | 0.283 | 1 |
| hsa-miR-375-3p    | URS00000ED600_9606 | 57.600    | 1.199  | 2.296  | 0.023 | 0.283 | 1 |
| hsa-miR-320d      | URS0000010C72_9606 | 134.600   | 1.016  | 2.023  | 0.023 | 0.283 | 1 |
| hsa-miR-6796-5p   | URS0000759E61_9606 | 2.692     | 2.454  | 5.478  | 0.023 | 0.283 | 1 |
| hsa-miR-4786-5p   | URS000023BDD3_9606 | 1.846     | 1.779  | 3.431  | 0.023 | 0.283 | 1 |
| hsa-miR-484       | URS0000597BED_9606 | 3301.800  | -1.036 | -2.051 | 0.024 | 0.295 | 1 |
| hsa-miR-29c-5p    | URS0000497496_9606 | 424.200   | -0.835 | -1.784 | 0.025 | 0.305 | 1 |
| hsa-miR-548au-5p  | URS000075CAF3_9606 | 73.600    | -0.877 | -1.837 | 0.027 | 0.326 | 1 |
| hsa-miR-19a-3p    | URS000006FDD4_9606 | 1111.400  | -0.917 | -1.889 | 0.028 | 0.328 | 1 |
| hsa-miR-449a      | URS00001F5B39_9606 | 23.200    | -1.184 | -2.273 | 0.028 | 0.328 | 1 |
| hsa-miR-150-3p    | URS00005EAAAD_9606 | 6.615     | 1.465  | 2.761  | 0.029 | 0.328 | 1 |

|                  |                    |           |        |        |       |       |   |
|------------------|--------------------|-----------|--------|--------|-------|-------|---|
| hsa-miR-3938     | URS000075EB68_9606 | 1.400     | -2.328 | -5.021 | 0.029 | #N/D  | 1 |
| hsa-miR-2116-3p  | URS00005237AB_9606 | 8.000     | -1.437 | -2.707 | 0.030 | 0.335 | 1 |
| hsa-miR-6505-5p  | URS000075D8DA_9606 | 4.154     | 1.375  | 2.593  | 0.030 | 0.339 | 1 |
| hsa-miR-222-3p   | URS00002C6949_9606 | 1930.600  | -0.783 | -1.720 | 0.031 | 0.339 | 1 |
| hsa-miR-6751-3p  | URS000075EDBE_9606 | 1.600     | -1.995 | -3.985 | 0.031 | #N/D  | 1 |
| hsa-miR-4767     | URS000035D2F9_9606 | 2.800     | -1.977 | -3.935 | 0.032 | 0.349 | 1 |
| hsa-miR-4454     | URS00005D12AC_9606 | 305.400   | -0.750 | -1.681 | 0.033 | 0.351 | 1 |
| hsa-miR-4446-3p  | URS000000EF0B_9606 | 172.600   | 0.903  | 1.870  | 0.033 | 0.351 | 1 |
| hsa-miR-3117-3p  | URS0000507F3E_9606 | 2.000     | -1.617 | -3.068 | 0.034 | 0.351 | 1 |
| hsa-miR-186-5p   | URS000040DCFF_9606 | 5407.400  | -0.723 | -1.651 | 0.034 | 0.351 | 1 |
| hsa-miR-151a-3p  | URS000016C318_9606 | 33270.200 | 0.718  | 1.645  | 0.034 | 0.351 | 1 |
| hsa-miR-491-5p   | URS00001919B0_9606 | 300.600   | -0.753 | -1.685 | 0.035 | 0.353 | 1 |
| hsa-miR-423-3p   | URS00000BE495_9606 | 9811.600  | -0.739 | -1.669 | 0.036 | 0.353 | 1 |
| hsa-miR-3657     | URS000075C59B_9606 | 2.200     | -1.744 | -3.349 | 0.036 | 0.353 | 1 |
| hsa-miR-28-5p    | URS00003E47B1_9606 | 407.600   | -0.745 | -1.676 | 0.036 | 0.353 | 1 |
| hsa-miR-664a-5p  | URS0000259AE4_9606 | 461.200   | 0.871  | 1.829  | 0.036 | 0.353 | 1 |
| hsa-miR-4785     | URS0000266339_9606 | 16.400    | -0.962 | -1.949 | 0.036 | 0.353 | 1 |
| hsa-miR-490-5p   | URS00004556E5_9606 | 11.000    | -1.422 | -2.680 | 0.037 | 0.353 | 1 |
| hsa-miR-671-5p   | URS00002FB368_9606 | 311.000   | -0.822 | -1.768 | 0.038 | 0.358 | 1 |
| hsa-miR-3200-3p  | URS0000381B86_9606 | 3.538     | 1.531  | 2.891  | 0.038 | 0.358 | 1 |
| hsa-miR-4662a-5p | URS00005140D0_9606 | 25.462    | 0.797  | 1.737  | 0.039 | 0.359 | 1 |
| hsa-miR-19b-3p   | URS000013D17D_9606 | 2734.200  | -0.811 | -1.755 | 0.039 | 0.359 | 1 |
| hsa-miR-5582-3p  | URS000075D126_9606 | 8.600     | -1.359 | -2.566 | 0.040 | 0.359 | 1 |
| hsa-miR-206      | URS000034B6F5_9606 | 11.154    | 1.904  | 3.743  | 0.041 | 0.359 | 1 |
| hsa-miR-128-1-5p | URS0000537082_9606 | 10.200    | 1.156  | 2.228  | 0.041 | 0.359 | 1 |
| hsa-miR-874-3p   | URS00005609ED_9606 | 40.400    | -0.808 | -1.751 | 0.041 | 0.359 | 1 |
| hsa-miR-4750-5p  | URS0000210075_9606 | 11.538    | 1.195  | 2.290  | 0.041 | 0.359 | 1 |
| hsa-miR-199a-5p  | URS0000554A4F_9606 | 2061.200  | -0.794 | -1.734 | 0.042 | 0.359 | 1 |
| hsa-miR-4433a-3p | URS00005A3BC9_9606 | 42.769    | 1.149  | 2.218  | 0.043 | 0.359 | 1 |
| hsa-miR-485-5p   | URS00001935FA_9606 | 242.600   | 0.862  | 1.818  | 0.043 | 0.359 | 1 |
| hsa-miR-181b-3p  | URS0000229622_9606 | 2.615     | 1.920  | 3.784  | 0.043 | 0.359 | 1 |
| hsa-miR-4659a-3p | URS00003003B4_9606 | 8.400     | -1.028 | -2.039 | 0.043 | 0.359 | 1 |
| hsa-miR-296-3p   | URS00001F4670_9606 | 49.600    | -1.047 | -2.066 | 0.043 | 0.359 | 1 |
| hsa-miR-10a-5p   | URS000016D2D4_9606 | 801.077   | 0.664  | 1.585  | 0.043 | 0.359 | 1 |
| hsa-miR-382-3p   | URS000013E79D_9606 | 143.200   | 0.814  | 1.758  | 0.044 | 0.359 | 1 |
| hsa-miR-3175     | URS00002394F5_9606 | 1.615     | 2.273  | 4.833  | 0.044 | 0.359 | 1 |
| hsa-miR-769-3p   | URS00005F5472_9606 | 110.200   | -0.868 | -1.825 | 0.044 | 0.359 | 1 |
| hsa-miR-2355-5p  | URS0000609C67_9606 | 19.200    | -1.054 | -2.077 | 0.045 | 0.359 | 1 |
| hsa-miR-16-1-3p  | URS000061CB8F_9606 | 15.600    | -1.079 | -2.113 | 0.045 | 0.359 | 1 |
| hsa-miR-4772-3p  | URS00005901AD_9606 | 1.077     | 2.584  | 5.995  | 0.045 | 0.359 | 1 |
| hsa-miR-24-2-5p  | URS00001DEE11_9606 | 6.400     | -1.563 | -2.955 | 0.046 | 0.359 | 1 |
| hsa-miR-503-5p   | URS00000F6E49_9606 | 367.200   | -0.791 | -1.730 | 0.047 | 0.371 | 1 |
| hsa-miR-597-5p   | URS000075BC35_9606 | 2.000     | -1.618 | -3.070 | 0.048 | 0.372 | 1 |
| hsa-miR-7109-5p  | URS000075EDFB_9606 | 1.000     | -2.693 | -6.467 | 0.049 | #N/D  | 1 |
| hsa-miR-196b-3p  | URS000052E1A6_9606 | 1.000     | -2.693 | -6.466 | 0.049 | #N/D  | 1 |
| hsa-miR-548g-3p  | URS000075C7C4_9606 | 14.308    | 0.967  | 1.955  | 0.049 | 0.375 | 1 |

|                 |                    |         |        |        |       |       |   |
|-----------------|--------------------|---------|--------|--------|-------|-------|---|
| hsa-miR-4701-5p | URS000021FE20_9606 | 8.800   | -0.917 | -1.888 | 0.049 | 0.375 | 1 |
| hsa-miR-577     | URS00004CD810_9606 | 1.200   | -2.133 | -4.385 | 0.050 | #N/D  | 1 |
| hsa-miR-188-3p  | URS000061AB33_9606 | 1.200   | -2.132 | -4.383 | 0.050 | #N/D  | 1 |
| hsa-miR-362-5p  | URS0000085F64_9606 | 120.200 | -0.760 | -1.694 | 0.050 | 0.375 | 1 |

Differentially expressed miRNAs in AHI versus CHI with p-value< 0.05 are represented. Identifiers represent the code attributed to each miRNA according to RNA central database. Max group mean is the maximum of the average of reads per kilobase per million mapped reads (RPKM).

**Supplementary Table S2.** GO Enrichment Analysis (p-values< 0.05).

| GO term | Description                                                                          | DE Genes | DE Genes (Names)                                                    | P-values |
|---------|--------------------------------------------------------------------------------------|----------|---------------------------------------------------------------------|----------|
| 0030947 | regulation of vascular endothelial growth factor receptor signaling pathway          | 2        | hsa-miR-296-5p,<br>hsa-miR-10b-5p                                   | 0.004581 |
| 0030949 | positive regulation of vascular endothelial growth factor receptor signaling pathway | 2        | hsa-miR-296-5p,<br>hsa-miR-10b-5p                                   | 0.004581 |
| 0090287 | regulation of cellular response to growth factor stimulus                            | 3        | hsa-miR-296-5p,<br>hsa-miR-1-3p,<br>hsa-miR-10b-5p                  | 0.015032 |
| 0051272 | positive regulation of cellular component movement                                   | 4        | hsa-miR-296-5p,<br>hsa-miR-1-3p,<br>hsa-miR-1290,<br>hsa-miR-10b-5p | 0.01662  |
| 1903672 | positive regulation of sprouting angiogenesis                                        | 3        | hsa-miR-296-5p,<br>hsa-miR-1-3p,<br>hsa-miR-10b-5p                  | 0.019807 |
| 0006928 | movement of cell or subcellular component                                            | 1        | hsa-miR-1-3p                                                        | 0.030612 |
| 0010460 | positive regulation of heart rate                                                    | 1        | hsa-miR-1-3p                                                        | 0.030612 |
| 0010638 | positive regulation of organelle organization                                        | 1        | hsa-miR-1-3p                                                        | 0.030612 |
| 0010640 | regulation of platelet-derived growth factor receptor signaling pathway              | 1        | hsa-miR-296-5p                                                      | 0.030612 |
| 0010641 | positive regulation of platelet-derived growth factor receptor signaling pathway     | 1        | hsa-miR-296-5p                                                      | 0.030612 |
| 0016477 | cell migration                                                                       | 1        | hsa-miR-1-3p                                                        | 0.030612 |
| 0032411 | positive regulation of transporter activity                                          | 1        | hsa-miR-1-3p                                                        | 0.030612 |
| 0032414 | positive regulation of ion transmembrane transporter activity                        | 1        | hsa-miR-1-3p                                                        | 0.030612 |
| 0035441 | cell migration involved in vasculogenesis                                            | 1        | hsa-miR-1-3p                                                        | 0.030612 |
| 0040011 | locomotion                                                                           | 1        | hsa-miR-1-3p                                                        | 0.030612 |
| 0045760 | positive regulation of action potential                                              | 1        | hsa-miR-1-3p                                                        | 0.030612 |
| 0045823 | positive regulation of heart contraction                                             | 1        | hsa-miR-1-3p                                                        | 0.030612 |
| 0045989 | positive regulation of striated muscle contraction                                   | 1        | hsa-miR-1-3p                                                        | 0.030612 |
| 0048641 | regulation of skeletal muscle tissue development                                     | 1        | hsa-miR-1-3p                                                        | 0.030612 |
| 0048643 | positive regulation of skeletal muscle tissue development                            | 1        | hsa-miR-1-3p                                                        | 0.030612 |
| 0048870 | cell motility                                                                        | 1        | hsa-miR-1-3p                                                        | 0.030612 |
| 0051495 | positive regulation of cytoskeleton organization                                     | 1        | hsa-miR-1-3p                                                        | 0.030612 |
| 0051928 | positive regulation of calcium ion transport                                         | 1        | hsa-miR-1-3p                                                        | 0.030612 |
| 0060297 | regulation of sarcomere organization                                                 | 1        | hsa-miR-1-3p                                                        | 0.030612 |
| 0060298 | positive regulation of sarcomere organization                                        | 1        | hsa-miR-1-3p                                                        | 0.030612 |
| 0060373 | regulation of ventricular cardiac muscle cell membrane depolarization                | 1        | hsa-miR-1-3p                                                        | 0.030612 |

|         |                                                                                                                                                                                    |   |              |          |
|---------|------------------------------------------------------------------------------------------------------------------------------------------------------------------------------------|---|--------------|----------|
| 0060411 | cardiac septum morphogenesis                                                                                                                                                       | 1 | hsa-miR-1-3p | 0.030612 |
| 0060412 | ventricular septum morphogenesis                                                                                                                                                   | 1 | hsa-miR-1-3p | 0.030612 |
| 0060452 | positive regulation of cardiac muscle contraction                                                                                                                                  | 1 | hsa-miR-1-3p | 0.030612 |
| 0060973 | cell migration involved in heart development                                                                                                                                       | 1 | hsa-miR-1-3p | 0.030612 |
| 0060980 | cell migration involved in coronary vasculogenesis                                                                                                                                 | 1 | hsa-miR-1-3p | 0.030612 |
| 0071875 | adrenergic receptor signaling pathway                                                                                                                                              | 1 | hsa-miR-1-3p | 0.030612 |
| 0086023 | adrenergic receptor signaling pathway involved in heart process                                                                                                                    | 1 | hsa-miR-1-3p | 0.030612 |
| 0086094 | positive regulation of ryanodine-sensitive calcium-release channel activity by adrenergic receptor signaling pathway involved in positive regulation of cardiac muscle contraction | 1 | hsa-miR-1-3p | 0.030612 |
| 0086103 | G-protein coupled receptor signaling pathway involved in heart process                                                                                                             | 1 | hsa-miR-1-3p | 0.030612 |
| 0090677 | reversible differentiation                                                                                                                                                         | 1 | hsa-miR-1-3p | 0.030612 |
| 1901018 | positive regulation of potassium ion transmembrane transporter activity                                                                                                            | 1 | hsa-miR-1-3p | 0.030612 |
| 1902115 | regulation of organelle assembly                                                                                                                                                   | 1 | hsa-miR-1-3p | 0.030612 |
| 1902117 | positive regulation of organelle assembly                                                                                                                                          | 1 | hsa-miR-1-3p | 0.030612 |
| 1903116 | positive regulation of actin filament-based movement                                                                                                                               | 1 | hsa-miR-1-3p | 0.030612 |
| 1903760 | regulation of voltage-gated potassium channel activity involved in ventricular cardiac muscle cell action potential repolarization                                                 | 1 | hsa-miR-1-3p | 0.030612 |
| 1903762 | positive regulation of voltage-gated potassium channel activity involved in ventricular cardiac muscle cell action potential repolarization                                        | 1 | hsa-miR-1-3p | 0.030612 |
| 1903818 | positive regulation of voltage-gated potassium channel activity                                                                                                                    | 1 | hsa-miR-1-3p | 0.030612 |
| 1903947 | positive regulation of ventricular cardiac muscle cell action potential                                                                                                            | 1 | hsa-miR-1-3p | 0.030612 |
| 1904427 | positive regulation of calcium ion transmembrane transport                                                                                                                         | 1 | hsa-miR-1-3p | 0.030612 |
| 1904879 | positive regulation of calcium ion transmembrane transport via high voltage-gated calcium channel                                                                                  | 1 | hsa-miR-1-3p | 0.030612 |
| 1905026 | positive regulation of membrane repolarization during ventricular cardiac muscle cell action potential                                                                             | 1 | hsa-miR-1-3p | 0.030612 |
| 1905033 | positive regulation of membrane repolarization during cardiac muscle cell action potential                                                                                         | 1 | hsa-miR-1-3p | 0.030612 |
| 1905904 | - No description available -                                                                                                                                                       | 1 | hsa-miR-1-3p | 0.030612 |
| 1905913 | - No description available -                                                                                                                                                       | 1 | hsa-miR-1-3p | 0.030612 |
| 2001014 | regulation of skeletal muscle cell differentiation                                                                                                                                 | 1 | hsa-miR-1-3p | 0.030612 |
| 2001016 | positive regulation of skeletal muscle cell differentiation                                                                                                                        | 1 | hsa-miR-1-3p | 0.030612 |
| 2001259 | positive regulation of cation channel activity                                                                                                                                     | 1 | hsa-miR-1-3p | 0.030612 |

GO Term was the code associated with the biological processes. DE were the genes associated to differentially expressed miRNAs.
